# Supplementary material
Source: PubMed Central journal article supplement (PMC1197429)
Supplement: plntcell_tpc.105.033985_1.pdf [file plntcell_tpc.105.033985_1.pdf]

**Supplemental Table 1: gene trap lines screened**

- Underlining marks gene trap lines that showed any GUS staining in floral organs or inflorescence or floral meristems
- Bolding marks gene trap lines examined in the secondary screen

| Pre7800s           | 7800s     | 7900s            | 8000s            | 8100s            | 8200s            | 8300s            | 8400s            | 8500s            | 8600s            | 8700s            | 8800s | 8900s           | 9000s            | 9100s            | 9200s            | 9300s            | 9400s            | 9500s | 9600s            |
|--------------------|-----------|------------------|------------------|------------------|------------------|------------------|------------------|------------------|------------------|------------------|-------|-----------------|------------------|------------------|------------------|------------------|------------------|-------|------------------|
| <b><u>6545</u></b> | 0         | 0                | 0                | 0                | 0                | <u>0</u>         | <b><u>0</u></b>  | 0                | 0                | 0                | 0     | 0               | 0                | <u>0</u>         | <b><u>0</u></b>  | 0                | 0                |       | 0                |
| <b><u>6576</u></b> | <u>1</u>  | 1                | 1                | 1                | 1                | 1                | 1                | 1                | 1                | 1                | 1     | 1               | 1                | <u>1</u>         | 1                | 1                | 1                |       | 1                |
| <u>6685</u>        | 2         | 2                | 2                | <b><u>2</u></b>  | 2                | 2                | 2                | 2                | 2                | 2                | 2     | 2               | 2                | 2                | 2                | 2                | 2                |       | 2                |
| <u>6702</u>        | 3         | 3                | 3                | <b><u>3</u></b>  | 3                | <b><u>3</u></b>  | 3                | <b><u>3</u></b>  | 3                | 3                | 3     | 3               | 3                | 3                | 3                | 3                | 3                |       | 3                |
| <b><u>6935</u></b> | 4         | 4                | 4                | 4                | 4                | <u>4</u>         | 4                | 4                | 4                | 4                | 4     | 4               | 4                | 4                | <u>4</u>         | 4                | 4                |       | 4                |
| <u>7036</u>        | 5         | 5                | 5                | 5                | 5                | 5                | 5                | 5                | 5                | 5                | 5     | 5               | 5                | 5                | 5                | 5                | 5                |       | 5                |
| <b><u>7038</u></b> | 6         | 6                | 6                | 6                | 6                | <b><u>6</u></b>  | 6                | 6                | <u>6</u>         | 6                | 6     | 6               | <b><u>6</u></b>  | 6                | <b><u>6</u></b>  | 6                | 6                |       | <b><u>6</u></b>  |
| <b><u>7062</u></b> | 7         | <u>7</u>         | <b><u>7</u></b>  | 7                | <u>7</u>         | 7                | 7                | 7                | <b><u>7</u></b>  | 7                | 7     | 7               | <b><u>7</u></b>  | <u>7</u>         | <u>7</u>         | 7                | 7                |       | 7                |
| <u>7286</u>        | 8         | 8                | 8                | 8                | 8                | 8                | 8                | 8                | 8                | <u>8</u>         | 8     | 8               | 8                | 8                | 8                | 8                | 8                |       | 8                |
| <b><u>7299</u></b> | 9         | 9                | 9                |                  | 9                | <b><u>9</u></b>  | 9                | 9                | 9                | 9                | 9     | <b><u>9</u></b> | <b><u>9</u></b>  | <u>9</u>         | <u>9</u>         | 9                | <b><u>9</u></b>  |       | <u>9</u>         |
|                    | 10        | 10               | 10               |                  | 10               | 10               | 10               | 10               | 10               | 10               | 10    | 10              | 10               | <b><u>10</u></b> | 10               | 10               | 10               |       | 10               |
|                    | 11        | <u>11</u>        | 11               |                  | 11               | <b><u>11</u></b> | 11               | 11               | 11               | <b><u>11</u></b> | 11    | 11              | 11               | <u>11</u>        | 11               | 11               | 11               |       | <b><u>11</u></b> |
|                    | 12        | <b><u>12</u></b> | <u>12</u>        | <u>12</u>        | 12               | 12               | 12               | 12               | <u>12</u>        | 12               | 12    | 12              | 12               | <u>12</u>        | 12               | 12               | 12               |       | 12               |
|                    | 13        | 13               | 13               | <b><u>13</u></b> | 13               | 13               | 13               | 13               | 13               | 13               | 13    | 13              | <b><u>13</u></b> | 13               | 13               | 13               | <b><u>13</u></b> |       | 13               |
|                    | 14        | 14               | 14               | 14               | <b><u>14</u></b> | 14               | 14               | 14               | <u>14</u>        | <u>14</u>        | 14    | 14              | 14               | 14               | <b><u>14</u></b> | 14               | 14               |       | 14               |
|                    | 15        | 15               | 15               | <b><u>15</u></b> | 15               | 15               | 15               | 15               | 15               | 15               | 15    | 15              | 15               | 15               | <b><u>15</u></b> | <b><u>15</u></b> | 15               |       | 15               |
|                    | 16        | 16               | 16               | 16               | <u>16</u>        | 16               | 16               | 16               | 16               | 16               | 16    | 16              | 16               | 16               | 16               | <b><u>16</u></b> | 16               |       | 16               |
|                    | 17        | 17               | 17               | <u>17</u>        | <b><u>17</u></b> | 17               | 17               | <b><u>17</u></b> | 17               | 17               | 17    | 17              | <u>17</u>        | 17               | 17               | 17               | 17               |       | 17               |
|                    | 18        | 18               | 18               | 18               | 18               | 18               | 18               | <u>18</u>        | 18               | 18               | 18    | 18              | 18               | 18               | 18               | 18               | 18               |       | 18               |
|                    | 19        | <u>19</u>        | 19               | 19               | 19               | 19               | 19               | 19               | <b><u>19</u></b> | 19               | 19    | 19              | <u>19</u>        | 19               | 19               | 19               | 19               |       | 19               |
|                    | 20        | 20               | 20               | 20               | 20               | 20               | 20               | 20               | 20               | 20               | 20    | 20              | 20               | 20               | 20               | 20               | 20               |       | 20               |
|                    | <u>21</u> | <b><u>21</u></b> | 21               | <b><u>21</u></b> | <u>21</u>        | <u>21</u>        | 21               | 21               | 21               | 21               | 21    | 21              | 21               | 21               | 21               | <b><u>21</u></b> | 21               |       | 21               |
|                    | 22        | 22               | 22               | 22               | 22               | 22               |                  | 22               | 22               | <b><u>22</u></b> | 22    | <u>22</u>       | 22               | 22               | 22               | 22               | 22               |       | 22               |
|                    | 23        | 23               | 23               | <u>23</u>        | 23               | 23               | 23               | <u>23</u>        | <b><u>23</u></b> | <u>23</u>        | 23    | 23              | 23               | <u>23</u>        | 23               |                  | 23               |       | 23               |
|                    | 24        | 24               | <u>24</u>        | 24               |                  | 24               | 24               | 24               | 24               | 24               | 24    | 24              | 24               | 24               | <b><u>24</u></b> | 24               | 24               |       | 24               |
|                    |           | 25               | 25               | 25               |                  | 25               | 25               | <b><u>25</u></b> | 25               | 25               | 25    | 25              | 25               | 25               | 25               | 25               | 25               |       | 25               |
|                    | 26        | 26               | <u>26</u>        | 26               | 26               | 26               | 26               | 26               | 26               | 26               | 26    | 26              | 26               | 26               | 26               | 26               | 26               |       | 26               |
|                    | 27        | 27               | <b><u>27</u></b> | 27               |                  | 27               | 27               | 27               | 27               | 27               | 27    | 27              | <b><u>27</u></b> | 27               | 27               | 27               | 27               | 27    | 27               |
|                    | 28        | 28               | <u>28</u>        | 28               | 28               | 28               | <u>28</u>        | 28               | 28               | 28               | 28    | 28              | 28               | 28               | 28               | 28               | 28               | 28    | 28               |
|                    | 29        | 29               | 29               | 29               | 29               | 29               | 29               | 29               | 29               | 29               | 29    | 29              | <u>29</u>        | 29               | <b><u>29</u></b> | 29               | 29               | 29    | 29               |
|                    | 30        | 30               | 30               | <u>30</u>        | 30               | 30               | <b><u>30</u></b> | 30               | 30               | 30               | 30    | 30              | <u>30</u>        | 30               | 30               | 30               | 30               | 30    | 30               |
|                    | 31        | 31               | 31               | 31               | 31               | <u>31</u>        | 31               | 31               | 31               | 31               | 31    | 31              | 31               | 31               | 31               | 31               | 31               | 31    | 31               |
|                    | 32        | 32               | <b><u>32</u></b> | <b><u>32</u></b> | 32               | 32               | 32               | 32               | 32               | 32               | 32    | 32              | <u>32</u>        | 32               | 32               | <b><u>32</u></b> | 32               | 32    | 32               |



|           |           |           |           |           |           |           |           |           |           |           |           |           |           |           |           |           |           |           |           |  |
|-----------|-----------|-----------|-----------|-----------|-----------|-----------|-----------|-----------|-----------|-----------|-----------|-----------|-----------|-----------|-----------|-----------|-----------|-----------|-----------|--|
| 72        | 72        | <u>72</u> | 72        |           | 72        | <u>72</u> | 72        | 72        | 72        | 72        | 72        | <u>72</u> | 72        | 72        | 72        | 72        | 72        | 72        | 72        |  |
| 73        |           | 73        | 73        | 73        | 73        | <u>73</u> | 73        | 73        | 73        | 73        | <u>73</u> | 73        | 73        | 73        | <u>73</u> | 73        | 73        | 73        | 73        |  |
| 74        |           | 74        | <u>74</u> | 74        | 74        | 74        | 74        | 74        | 74        | 74        | 74        | 74        | 74        | 74        | 74        | 74        | 74        | 74        | 74        |  |
| <u>75</u> |           | 75        | 75        | <u>75</u> | 75        | 75        | 75        | 75        | 75        | 75        | 75        | <u>75</u> | 75        | 75        | <u>75</u> | 75        | 75        | <u>75</u> | 75        |  |
| 76        | 76        | 76        | <u>76</u> | 76        | 76        | 76        | 76        | 76        | 76        | 76        | <u>76</u> | 76        | <u>76</u> | 76        | 76        | 76        | 76        | 76        | 76        |  |
| 77        | <u>77</u> | 77        | 77        | 77        | 77        | 77        | 77        | 77        | 77        | 77        | 77        | 77        | 77        | 77        | 77        | 77        | 77        | 77        | 77        |  |
| 78        | 78        | <u>78</u> | 78        | 78        | <u>78</u> | 78        | 78        | 78        | 78        | 78        | 78        | 78        | <u>78</u> | 78        | 78        | 78        | 78        | 78        | 78        |  |
| 79        | 79        | 79        | <u>79</u> | 79        | 79        | 79        | 79        | 79        | 79        | 79        | 79        | <u>79</u> | 79        | 79        | 79        | 79        | 79        | 79        | 79        |  |
| <u>80</u> | 80        | 80        | 80        | 80        | <u>80</u> | 80        | 80        | 80        | 80        | 80        | 80        | 80        | 80        | <u>80</u> | 80        | 80        | 80        | 80        | 80        |  |
| 81        | 81        | 81        | 81        | 81        | 81        | 81        | 81        | 81        | <u>81</u> | 81        | 81        | 81        | 81        | 81        | 81        | 81        | 81        | 81        | 81        |  |
| <u>82</u> | <u>82</u> | <u>82</u> | 82        | <u>82</u> | 82        | 82        | 82        | 82        | 82        | <u>82</u> | <u>82</u> | 82        | 82        | <u>82</u> | 82        | 82        | 82        | 82        | 82        |  |
| 83        | 83        | 83        | 83        | 83        | 83        | 83        | 83        | 83        | 83        | <u>83</u> | 83        | 83        | 83        | 83        | 83        | 83        | 83        | 83        | 83        |  |
| 84        | 84        | <u>84</u> | 84        | <u>84</u> | <u>84</u> | 84        | 84        | 84        | 84        | <u>84</u> |           | 84        | 84        | 84        | 84        | 84        | 84        | <u>84</u> | 84        |  |
| <u>85</u> | <u>85</u> | <u>85</u> | 85        | 85        | 85        | <u>85</u> | 85        | 85        | 85        | 85        | 85        | 85        | 85        | 85        | 85        | 85        | 85        | 85        | 85        |  |
| 86        | 86        | 86        | <u>86</u> | 86        |           | 86        | 86        | <u>86</u> | 86        | 86        | 86        | 86        | 86        | 86        | 86        | 86        | 86        | 86        | 86        |  |
| 87        | 87        | 87        | 87        | 87        | 87        | 87        | 87        | 87        | 87        | <u>87</u> | 87        | 87        | <u>87</u> | 87        | 87        | 87        | 87        | 87        | 87        |  |
| <u>88</u> | 88        | 88        | 88        | <u>88</u> | 88        | 88        | 88        | 88        | 88        | 88        | 88        | 88        | 88        | 88        | 88        | <u>88</u> | 88        | 88        | 88        |  |
| <u>89</u> | 89        | 89        | 89        | 89        |           | 89        | 89        | <u>89</u> | 89        | 89        | 89        | 89        | 89        | 89        | 89        | 89        | <u>89</u> |           | <u>89</u> |  |
| 90        | 90        | 90        | 90        | <u>90</u> | 90        | 90        | 90        | 90        | 90        | 90        | 90        | <u>90</u> | 90        | 90        | 90        | 90        | 90        | 90        | 90        |  |
| 91        | <u>91</u> | 91        | 91        | 91        | 91        | 91        | 91        | 91        | 91        | 91        | 91        | 91        | 91        | 91        | 91        | 91        | 91        | 91        | 91        |  |
| 92        | 92        | 92        | 92        | 92        |           | 92        | 92        | 92        | 92        | 92        | <u>92</u> | 92        | 92        | 92        | 92        | 92        | 92        | 92        | 92        |  |
| 93        | 93        | 93        | <u>93</u> | 93        | <u>93</u> | <u>93</u> | 93        | 93        | 93        | 93        | <u>93</u> | 93        | 93        | 93        | <u>93</u> | 93        | 93        | 93        | 93        |  |
| 94        | 94        | 94        | 94        | <u>94</u> | 94        | 94        | 94        | 94        | 94        | <u>94</u> | 94        | 94        | 94        | 94        | 94        | <u>94</u> | 94        | 94        | 94        |  |
| 95        | 95        | 95        | 95        | <u>95</u> |           | 95        | 95        | 95        | 95        | 95        | 95        | 95        | 95        | 95        | 95        | 95        | 95        | 95        | 95        |  |
| 96        | 96        | <u>96</u> | 96        | 96        | 96        | 96        | <u>96</u> | 96        | 96        | 96        | 96        | 96        | 96        | 96        | 96        | 96        | 96        | 96        | 96        |  |
| 97        | 97        | 97        | 97        | 97        | 97        | <u>97</u> | 97        | 97        | 97        | 97        | 97        | 97        | 97        | <u>97</u> | 97        | 97        | 97        | 97        | 97        |  |
| 98        | 98        | 98        | <u>98</u> | 98        | <u>98</u> | <u>98</u> | 98        | 98        | 98        | 98        | 98        | 98        | <u>98</u> | 98        | 98        | 98        | 98        | 98        | 98        |  |
| 99        | <u>99</u> | 99        | 99        | 99        | 99        | 99        | 99        | 99        | 99        | 99        | 99        | <u>99</u> | <u>99</u> | 99        | 99        | 99        | 99        | 99        | 99        |  |

TOTAL

|                                  |    |    |    |     |    |    |    |    |     |     |     |    |    |    |    |    |    |    |    |    |      |
|----------------------------------|----|----|----|-----|----|----|----|----|-----|-----|-----|----|----|----|----|----|----|----|----|----|------|
| Lines with staining              | 10 | 15 | 20 | 18  | 27 | 17 | 22 | 17 | 12  | 16  | 14  | 11 | 13 | 21 | 18 | 17 | 13 | 7  | 8  | 6  | 302  |
| Lines without staining           | 0  | 84 | 77 | 82  | 66 | 71 | 71 | 82 | 88  | 84  | 86  | 86 | 83 | 76 | 81 | 82 | 84 | 78 | 63 | 39 | 1463 |
| Lines used in the primary screen | 10 | 99 | 97 | 100 | 93 | 88 | 93 | 98 | 100 | 100 | 100 | 97 | 96 | 97 | 99 | 99 | 97 | 85 | 71 | 45 | 1765 |

|                                    |   |   |    |   |   |    |   |    |   |   |   |   |   |    |   |   |   |   |   |   |     |
|------------------------------------|---|---|----|---|---|----|---|----|---|---|---|---|---|----|---|---|---|---|---|---|-----|
| Lines used in the secondary screen | 6 | 4 | 10 | 6 | 9 | 12 | 9 | 12 | 8 | 5 | 7 | 7 | 8 | 10 | 7 | 8 | 6 | 4 | 3 | 3 | 144 |
|------------------------------------|---|---|----|---|---|----|---|----|---|---|---|---|---|----|---|---|---|---|---|---|-----|
