# Supplementary material
Source: PubMed Central journal article supplement (PMC1197429)
Supplement: plntcell_tpc.105.033985_2.pdf [file plntcell_tpc.105.033985_2.pdf]

**Supplemental table 2: Flanking sequences and gene specific primers used to identify gene trap insertion sites**

- Flanking sequences can be found in GenBank and at <http://genetrap.cshl.org>

| GT Line | Flanking sequences                           | Gene specific primers                |
|---------|----------------------------------------------|--------------------------------------|
| GT6545  | AY202313 AY202314                            |                                      |
| GT7038  | AY202496 AY202497                            |                                      |
| GT7299  | CW838978 CZ559783                            |                                      |
| GT7833  | CZ559784 CZ559785                            |                                      |
| GT7847  | CW839189 CZ559768                            |                                      |
| GT7848  | AY202890 AY202891                            |                                      |
| GT7850  | CW839191                                     | GT7850: 5'-CAGTTGAATCTCCACCGAC-3'    |
| GT7885  |                                              |                                      |
| GT7912  | CW839218 CZ559769 CZ559770 CZ559786 CZ559787 |                                      |
| GT7921  | CW839222                                     | GT7921: 5'-CTCGGTTTCTTCAGTACTCC-3'   |
| GT7953  | AY202939 AY202938                            |                                      |
| GT7969  | AY202950 AY202951 AY202952 CW839245          |                                      |
| GT7991  | AY202964 AY202965                            |                                      |
| GT8007  | AY202974 AY202975                            |                                      |
| GT8027  | CW839280 CZ559788 CZ559789                   |                                      |
| GT8066  | CW839297 CW839296                            |                                      |
| GT8096  | CZ559791                                     | GT8096-2: 5'-GATTCTACCACACCTTCAGC-3' |
| GT8102  | CW839319                                     | GT8102: 5'-GAGGAAAGTTGTGAACTTAAC-3'  |
| GT8103  | AY203002 AY203003                            |                                      |
| GT8113  | CZ559772 CZ559792                            |                                      |
| GT8115  | CZ559773                                     | GT8115: 5'-GAACGCTAGCGACACGAC-3'     |
| GT8121  | CZ559793                                     | GT8121: 5'-GATGTAGTCGGAGGTAGCAG-3'   |
| GT8132  | CZ559794 CZ559795                            | GT8132-2: 5'-GAGCCACTGCTTCGAAGA-3'   |
| GT8137  | AY203013 AY203014                            |                                      |
| GT8163  | CW839347 CW839348                            |                                      |
| GT8252  | CW839401 CZ559774 CZ559796                   |                                      |
| GT8282  | CW839410 CW839411 CZ559775 CZ559776 CZ559797 |                                      |
| GT8309  |                                              |                                      |
| GT8311  | AY203033 AY203034                            |                                      |
| GT8335  | CZ559798                                     | GT8335: 5'-CTACCTGTTACAGTCCACAG-3'   |
| GT8362  | AY203053 AY203054                            |                                      |
| GT8378  | CZ559777 CZ559799                            |                                      |
| GT8398  | CW839495                                     | GT8398: 5'-CGAAAACCTCTACTCGTCAAGC-3' |
| GT8400  | CW839497 CW839498                            |                                      |
| GT8430  | CW839516 CZ559800 CZ559801                   | GT8430: 5'-TAAGTTCCTTCCTTTGGTTG-3'   |
| GT8435  | CW839522                                     | GT8435: 5'-GTCGTCGACCATCTTCTTC-3'    |
| GT8450  | CZ559802                                     | GT8450: 5'-GAGTGAGTCTTTAAGCCGTG-3'   |
| GT8454  | AY203085 AY203086                            |                                      |
| GT8465  | CZ559803                                     | GT8465: 5'-GTTGGGTTATATGTTTGTAGG-3'  |
| GT8472  | AY203101 AY203102 AY203103 AY203104          |                                      |
| GT8473  | AY203105 AY203106                            |                                      |

|        |          |          |          |                                           |
|--------|----------|----------|----------|-------------------------------------------|
| GT8485 | AY203123 | AY203124 |          |                                           |
| GT8503 | AY203130 | AY203131 |          |                                           |
| GT8517 | AY203142 | AY203143 |          |                                           |
| GT8535 | CZ559804 |          |          | GT8535: 5'-CTTGAGTTCAAATGGGTAAGAA-3'      |
| GT8554 | CW839568 | CZ559805 |          |                                           |
| GT8555 | AY203161 | AY203162 |          |                                           |
| GT8607 | CW839599 | CW839600 |          |                                           |
| GT8612 | CW839605 |          |          | GT8612: 5'-GAACTCTACGAGTCCGTTG-3'         |
| GT8619 | CW839612 |          |          | GT8619: 5'-GAGAAATGCTTCTACACACTC-3'       |
| GT8623 | CW839616 |          |          | GT8623: 5'-CAACGTCCATGTCTATGCATAG-3'      |
| GT8635 |          |          |          |                                           |
| GT8686 | CZ559806 |          |          | GT8686: 5'-GAAGAGGGAGAGTAGAATTG-3'        |
| GT8749 | AY203219 | AY203230 |          |                                           |
| GT8761 | AY203225 | AY203226 |          |                                           |
| GT8763 | CZ559807 | CZ559808 |          |                                           |
| GT8771 |          |          |          |                                           |
| GT8838 | CZ559809 |          |          | GT8838R: 5'-GAACCGTTCAGGACCATAG-3'        |
| GT8854 | CZ559778 | CZ559810 |          |                                           |
| GT8860 | CZ559779 |          |          | GT8860: 5'-GTCTCTTAGAGCACGTGCAG-3'        |
| GT8869 | CZ559780 |          |          | GT8869: 5'-GAGATGTCGCTCCTCCTG-3'          |
| GT8883 | CZ559811 | CZ559812 |          |                                           |
| GT8884 | CW839798 | CZ559813 |          |                                           |
| GT8990 | CW839846 | CZ559781 | CZ559814 |                                           |
| GT8992 |          |          |          |                                           |
| GT9007 | CW839857 | CW839858 | CW839859 |                                           |
| GT9013 | CW839862 |          |          |                                           |
| GT9098 | CW839930 | CZ559815 |          |                                           |
| GT9099 | CW839931 | CZ559816 |          | GT9099: 5'-GTAAGTTCCTTCCTTTGGTTG-3'       |
| GT9197 | CZ559817 |          |          | GT9167: 5'-GTTTATATAAAAATGGATTCCCTC-3'    |
| GT9206 | CZ559818 |          |          | GT9206: 5'-CCTCTGGCTTCTTATGCATC-3'        |
| GT9207 | CZ559819 |          |          | GT9207: 5'-CACTCGATACTGGTAATGCTC-3'       |
| GT9280 | CW840013 | CZ559820 |          | GT9280: 5'-CTTGCTCCGTTGGATACTTC-3'        |
| GT9315 | CW840028 | CW840029 | CZ559821 |                                           |
| GT9316 | CZ559822 | CZ559823 |          |                                           |
| GT9356 | CW840056 |          |          | GT9356: 5'-CTTAGAATCCAAGCTTGGTTC-3'       |
| GT9389 | CW840075 | CZ559824 | CZ559825 | GT9389/TPC1: 5'-CTCAGCTACCTTTTGTTC AAC-3' |
| GT9409 | AY20341  | AY203432 |          |                                           |
| GT9411 | AY203433 | CZ559782 | CZ559826 |                                           |
| GT9447 | AY203449 | AY203450 |          |                                           |
| GT9551 | AY203500 | AY203501 |          |                                           |
| GT9606 | CZ559828 | CZ559829 |          | GT9606R: 5'-GAAGACATCATCATCGTCTTC-3'      |
| GT9609 | AY203520 | AY203521 |          |                                           |
| GT9639 | CW840219 |          |          | GT9639: 5'-GAGAAATGCTGGTGTGCAAG-3'        |
| GT9643 |          |          |          |                                           |
