# Supplementary material
Source: PubMed Central journal article supplement (PMC1197429)
Supplement: plntcell_tpc.105.033985_3.pdf [file plntcell_tpc.105.033985_3.pdf]

Supplemental table 3: Comparison of the gene trap data to array-based expression analyses

The genes isolated from our gene trap screen expressed in petal and/or stamen-specific patterns (i.e. the gray-shaded genes in Table 3) were examined for correlation with results from microarray-based surveys of gene expression and screens for petal and/or stamen-enriched genes.

|                 |                    | GT Lines                        | Annotation | GUS staining pattern                           | Identification by microarray – based screens <sup>a</sup> | AtGenExpress Data <sup>b</sup> |                 |                 |                 |                 |                 |                 |                 |                 |                 |
|-----------------|--------------------|---------------------------------|------------|------------------------------------------------|-----------------------------------------------------------|--------------------------------|-----------------|-----------------|-----------------|-----------------|-----------------|-----------------|-----------------|-----------------|-----------------|
|                 |                    |                                 |            |                                                |                                                           | Root                           | Seedling        | Stage 12 flower |                 |                 |                 | Stage 15 flower |                 |                 |                 |
|                 |                    |                                 |            |                                                |                                                           |                                |                 | Sepal           | Petal           | Stamen          | Carpel          | Sepal           | Petal           | Stamen          | Carpel          |
| Petal-specific  | Expression         | GT7921                          | At5g54880  | Petal-specific stages 8-11*                    |                                                           | 4.64<br>(0.19)                 | 5.18<br>(0.15)  | 4.50<br>(0.09)  | 4.21<br>(0.33)  | 3.71<br>(0.41)  | 4.55<br>(0.12)  | 4.00<br>(0.43)  | 4.38<br>(0.48)  | 4.79<br>(0.41)  | 4.81<br>(0.2)   |
|                 |                    | GT8132                          | At1g35560  | Petal-specific stage 6 and on                  |                                                           | 4.61<br>(0.17)                 | 6.14<br>(0.17)  | 3.76<br>(0.21)  | 4.40<br>(0.24)  | 3.92<br>(0.05)  | 3.82<br>(0.08)  | 4.38<br>(0.30)  | 5.09<br>(0.14)  | 4.78<br>(0.32)  | 3.95<br>(0.24)  |
|                 | Lack of expression | GT8282                          | At3g11340  | Not in petals, stages 11 and 12*               |                                                           | 8.66<br>(0.03)                 | 3.48<br>(0.32)  | 10.28<br>(0.14) | 3.32<br>(0.22)  | 3.25<br>(0.25)  | 2.94<br>(0.05)  | 9.99<br>(0.20)  | 4.26<br>(0.36)  | 7.36<br>(0.12)  | 3.37<br>(0.38)  |
|                 |                    | GT8454                          | At3g10060  | Not in expanded petal lamina, stage 13 and on* |                                                           | 4.42<br>(0.24)                 | 10.18<br>(0.10) | 9.78<br>(0.06)  | 7.71<br>(0.11)  | 5.62<br>(0.36)  | 6.99<br>(0.10)  | 8.39<br>(0.11)  | 8.12<br>(0.09)  | 7.86<br>(0.11)  | 7.83<br>(0.1)   |
|                 |                    | GT8883                          | At1g01170  | Not in petals, stages 8-13*                    |                                                           | 7.70<br>(0.12)                 | 10.35<br>(0.17) | 10.63<br>(0.06) | 10.17<br>(0.10) | 8.24<br>(0.10)  | 10.50<br>(0.02) | 8.88<br>(0.07)  | 9.22<br>(0.12)  | 9.15<br>(0.07)  | 10.76<br>(0.03) |
|                 |                    | GT9409                          | At4g16890  | Not in petals, stage 11 and on *               |                                                           | 5.35<br>(0.30)                 | 8.30<br>(0.11)  | 8.11<br>(0.13)  | 6.35<br>(0.15)  | 5.73<br>(0.56)  | 6.61<br>(0.10)  | 8.29<br>(0.37)  | 7.14<br>(0.05)  | 6.65<br>(0.22)  | 6.99<br>(0.18)  |
| GT9447          | At2g01100          | Not in petals, stage 12 and on* |            | 9.63<br>(0.09)                                 | 7.87<br>(0.25)                                            | 3.16<br>(0.17)                 | 8.93<br>(0.07)  | 8.85<br>(0.07)  | 9.17<br>(0.08)  | 8.65<br>(0.06)  | 8.85<br>(0.03)  | 8.93<br>(0.06)  | 8.99<br>(0.03)  |                 |                 |
| Stamen-specific | Expression         | GT7848                          | At2g34920  | Mainly in stomium, stages 7-11*                |                                                           | 5.08<br>(0.15)                 | 5.03<br>(0.10)  | 4.09<br>(0.41)  | 4.20<br>(0.08)  | 7.91<br>(0.05)  | 4.03<br>(0.08)  | 3.43<br>(0.14)  | 3.01<br>(0.18)  | 3.26<br>(0.52)  | 4.36<br>(0.1)   |
|                 |                    | GT8335                          | At4g33355  | Anther-specific, stages 8-12                   |                                                           | N/A                            | N/A             | N/A             | N/A             | N/A             | N/A             | N/A             | N/A             | N/A             | N/A             |
|                 |                    | GT8362                          | At4g00430  | Mainly in stamen filaments, stages 8-10*       |                                                           | 10.56<br>(0.04)                | 11.81<br>(0.03) | 12.45<br>(0.04) | 11.54<br>(0.01) | 11.11<br>(0.07) | 12.55<br>(0.02) | 12.56<br>(0.03) | 11.9<br>(0.15)  | 11.97<br>(0.05) | 12.52<br>(0.05) |
|                 |                    | GT8430                          | At3g06430  | Anther-specific, stage 8 and on                |                                                           | N/A                            | N/A             | N/A             | N/A             | N/A             | N/A             | N/A             | N/A             | N/A             | N/A             |
|                 |                    | GT8435                          | At5g66200  | Anther-specific, stages 8-12*                  |                                                           | 7.45<br>(0.11)                 | 7.49<br>(0.15)  | 7.62<br>(0.11)  | 7.02<br>(0.05)  | 6.53<br>(0.11)  | 7.00<br>(0.02)  | 8.00<br>(0.15)  | 7.54<br>(0.07)  | 7.46<br>(0.03)  | 6.95<br>(0.07)  |
|                 |                    | GT8555                          | At3g10550  | Locule-specific, stages 8-12                   |                                                           | 7.18<br>(0.11)                 | 6.43<br>(0.14)  | 6.94<br>(0.02)  | 6.86<br>(0.16)  | 8.4<br>(0.11)   | 7.58<br>(0.09)  | 7.59<br>(0.05)  | 8.31<br>(0.11)  | 8.31<br>(0.11)  | 6.84<br>(0.02)  |
|                 |                    | GT8612                          | At1g32250  | Anther-specific, stage 10 and on*              | 1: 'stamen-specific'                                      | 2.34<br>(0.02)                 | 2.53<br>(0.06)  | 2.77<br>(0.21)  | 2.82<br>(0.41)  | 9.03<br>(0.11)  | 2.36<br>(0.03)  | 2.46<br>(0.13)  | 2.45<br>(0.03)  | 2.57<br>(0.10)  | 2.39<br>(0.03)  |
|                 |                    | GT8838                          | At1g72360  | Anther-specific, stages 8-11                   |                                                           | 8.53<br>(0.04)                 | 3.41<br>(0.69)  | 4.81<br>(0.11)  | 3.71<br>(0.06)  | 4.43<br>(0.35)  | 3.38<br>(0.33)  | 5.69<br>(0.35)  | 6.06<br>(0.30)  | 4.18<br>(0.27)  | 3.49<br>(0.12)  |
|                 |                    | GT8854                          | At4g24740  | Anther-specific, stage 8 and on                |                                                           | 9.21<br>(0.07)                 | 9.24<br>(0.12)  | 9.17<br>(0.06)  | 9.57<br>(0.04)  | 10.05<br>(0.02) | 9.42<br>(0.14)  | 9.90<br>(0.18)  | 10.26<br>(0.09) | 10.32<br>(0.06) | 9.29<br>(0.04)  |
|                 |                    | GT9007                          | At3g11210  | Anther-specific, stages 8-12                   |                                                           | 4.49<br>(0.22)                 | 7.03<br>(0.04)  | 6.46<br>(0.07)  | 10.77<br>(0.04) | 9.58<br>(0.07)  | 8.65<br>(0.06)  | 4.29<br>(0.62)  | 7.54<br>(0.1)   | 8.29<br>(0.14)  | 8.85<br>(0.1)   |

|                           |                    |        |           |                                             |                      |                 |                 |                 |                 |                 |                 |                 |                 |                 |                 |     |
|---------------------------|--------------------|--------|-----------|---------------------------------------------|----------------------|-----------------|-----------------|-----------------|-----------------|-----------------|-----------------|-----------------|-----------------|-----------------|-----------------|-----|
|                           |                    | GT9013 | At5g66270 | Anther-specific, stages 8-12                |                      | N/A             |     |
|                           |                    | GT9099 | At3g06433 | Anther-specific, stages 8-12                |                      | N/A             |     |
|                           |                    | GT9207 | At2g10950 | Anther-specific, stages 8-12                |                      | 8.56<br>(0.04)  | 7.92<br>(0.06)  | 8.62<br>(0.05)  | 9.33<br>(0.09)  | 8.81<br>(0.06)  | 8.91<br>(0.07)  | 9.23<br>(0.02)  | 9.41<br>(0.05)  | 8.91<br>(0.09)  | 8.70<br>(0.08)  |     |
|                           |                    | GT9280 | At3g15510 | Anther-specific, stage 8 and on             | 1: 'stamen-specific' | 5.42<br>(0.27)  | 4.80<br>(0.20)  | 7.78<br>(0.12)  | 4.36<br>(0.09)  | 10.88<br>(0.07) | 3.62<br>(0.05)  | 7.91<br>(0.20)  | 6.64<br>(0.47)  | 7.17<br>(0.24)  | 3.59<br>(0.07)  |     |
|                           |                    | GT9316 | At3g12630 | Anther-specific, stage 8 and on             |                      | 11.30<br>(0.05) | 10.00<br>(0.08) | 10.68<br>(0.10) | 10.51<br>(0.02) | 11.38<br>(0.15) | 10.62<br>(0.04) | 11.16<br>(0.15) | 11.53<br>(0.04) | 11.93<br>(0.03) | 10.57<br>(0.01) |     |
|                           |                    | GT9389 | At4g03560 | Anther-specific, stages 8-14*               |                      | 10.25<br>(0.06) | 9.96<br>(0.16)  | 9.49<br>(0.06)  | 9.58<br>(0.02)  | 9.49<br>(0.10)  | 9.25<br>(0.06)  | 9.32<br>(0.13)  | 9.22<br>(0.09)  | 8.98<br>(0.08)  | 9.40<br>(0.02)  |     |
|                           |                    | GT9606 | At3g14230 | Mainly in anthers, stage 6 and on*          |                      | 9.43<br>(0.08)  | 8.84<br>(0.20)  | 9.07<br>(0.06)  | 9.13<br>(0.02)  | 10.40<br>(0.07) | 9.37<br>(0.12)  | 8.89<br>(0.05)  | 9.17<br>(0.08)  | 9.43<br>(0.08)  | 9.79<br>(0.04)  |     |
| Petal-and-stamen-specific | Expression         | GT6545 | At5g10320 | Petal and stamen-specific, stages 9-12      |                      | 4.64<br>(0.33)  | 4.90<br>(0.16)  | 4.42<br>(0.02)  | 5.89<br>(0.38)  | 3.15<br>(0.16)  | 5.78<br>(0.20)  | 3.50<br>(0.20)  | 3.96<br>(0.31)  | 3.27<br>(0.25)  | 5.40<br>(0.08)  |     |
|                           |                    | GT8007 | At3g10700 | Petal and stamen-specific, stages 8-11*     |                      | 6.38<br>(0.17)  | 6.76<br>(0.20)  | 6.05<br>(0.01)  | 6.78<br>(0.23)  | 7.14<br>(0.06)  | 6.59<br>(0.22)  | 5.06<br>(0.29)  | 5.39<br>(0.21)  | 5.33<br>(0.34)  | 6.44<br>(0.09)  |     |
|                           |                    | GT8103 | At5g08180 | Petal and stamen-specific, stages 11-12*    |                      | 10.28<br>(0.05) | 9.18<br>(0.06)  | 8.37<br>(0.14)  | 8.72<br>(0.04)  | 7.86<br>(0.15)  | 10.02<br>(0.10) | 7.34<br>(0.11)  | 7.17<br>(0.07)  | 6.53<br>(0.14)  | 9.91<br>(0.08)  |     |
|                           |                    | GT8400 | At1g63140 | Petals and stamen-specific, stage 11 and on |                      | N/A             | N/A |
|                           |                    | GT8472 | At3g12370 | Petal and stamen-specific, stages 9-11*     |                      | 8.46<br>(0.07)  | 7.86<br>(0.08)  | 7.97<br>(0.07)  | 8.32<br>(0.12)  | 7.63<br>(0.06)  | 8.50<br>(0.13)  | 7.63<br>(0.01)  | 7.34<br>(0.05)  | 7.06<br>(0.05)  | 8.47<br>(0.08)  |     |
|                           |                    | GT8517 | At2g43680 | Mainly in petals and stamens, stage 11*     |                      | 9.46<br>(0.02)  | 7.92<br>(0.03)  | 8.23<br>(0.05)  | 8.33<br>(0.07)  | 7.12<br>(0.02)  | 9.11<br>(0.07)  | 9.06<br>(0.09)  | 8.83<br>(0.03)  | 8.59<br>(0.09)  | 9.15<br>(0.06)  |     |
|                           |                    | GT8990 | At5g04200 | Petal and stamen-specific, stages 12-13*    |                      | 6.11<br>(0.13)  | 4.23<br>(0.27)  | 6.86<br>(0.09)  | 5.97<br>(0.22)  | 6.56<br>(0.02)  | 2.49<br>(0.33)  | 8.47<br>(0.07)  | 12.14<br>(0.17) | 10.19<br>(0.04) | 7.14<br>(0.16)  |     |
|                           | Lack of Expression | GT8066 | At1g54270 | Not in petals or stamens, stage 10 and on   |                      | 10.55<br>(0.04) | 11.07<br>(0.04) | 10.79<br>(0.09) | 10.69<br>(0.11) | 11.40<br>(0.14) | 11.11<br>(0.03) | 11.45<br>(0.03) | 10.69<br>(0.07) | 11.03<br>(0.06) | 11.04<br>(0.05) |     |
|                           |                    | GT8096 | At2g01110 | Not in petals or stamens, stage 10 and on*  |                      | 5.55<br>(0.19)  | 9.81<br>(0.07)  | 9.79<br>(0.10)  | 7.69<br>(0.03)  | 6.74<br>(0.08)  | 7.26<br>(0.10)  | 9.43<br>(0.10)  | 8.63<br>(0.20)  | 7.79<br>(0.17)  | 7.84<br>(0.12)  |     |

\*Different expression patterns in other stages.

<sup>a</sup>Microarray-based screen for petal and/or stamen-specific genes examined in this analysis:

- Wellmer et al. (2004): Isolated genes particularly enriched in each type of floral organs by screening for genes whose expression levels were changed more than 2 folds in multiple floral homeotic mutant backgrounds. The whole genome array used in this study contained 26,090 oligonucleotide species.
- Zik and Irish (2003): Isolated petal or stamen-enriched and/or -repressed genes by screening for genes whose expression levels were changed more than 1.8 folds in combinations of mutant/transgenic backgrounds with fewer or excess petals and/or stamens. The array used in this study contained 6,120 unique EST clones.
- Amagai et al. (2003): Isolated anther-enriched genes by screening for genes whose expression was significantly enriched in anthers compared to leaves. The cDNA microarray used in this study contained 2,880 clones.

<sup>b</sup>AtGenExpress data reported in Schmid et al. (2005):

Affymetrix ATH1 arrays containing 22,746 probe sets were hybridized to mRNAs from various tissues. The averages and standard deviations (in parentheses) among the triplicates of the normalized expression estimates for each tissue types were shown. The experiments reported here are:

- Roots – ATGE\_9: Roots of 17 day-old wildtype (Col) plants
- Seedlings – ATGE\_7: green parts of 7 day-old wildtype (Col) seedlings

- Stage 12 flowers:
  - Sepals – ATGE\_34: sepals in stage 12 flowers of 21+ day-old wildtype (Col) plants
  - Petals – ATGE\_35: petals in stage 12 flowers of 21+ day-old wildtype (Col) plants
  - Stamens – ATGE\_36: stamens in stage 12 flowers of 21+ day-old wildtype (Col) plants
  - Carpels – ATGE\_37: carpels in stage 12 flowers of 21+ day-old wildtype (Col) plants
- Stage 15 flowers:
  - Sepals – ATGE\_41: sepals in stage 15 flowers of 21+ day-old wildtype (Col) plants
  - Petals – ATGE\_42: petals in stage 15 flowers of 21+ day-old wildtype (Col) plants
  - Stamens – ATGE\_43: stamens in stage 15 flowers of 21+ day-old wildtype (Col) plants
  - Carpels – ATGE\_45: carpels in stage 15 flowers of 21+ day-old wildtype (Col) plants
